# Supplementary material for: Input Connectivity Reveals Additional Heterogeneity of Dopaminergic Reinforcement in Drosophila
Source: PubMed Central journal article supplement (PMC7443709; doi:10.1016/j.cub.2020.05.077), 2020-08-17

## Revision Status Table

Table details the review status of each DAN traced and analysed in this study. The total number of identified dendritic postsynapses on each DAN and the percentage of the postsynapses that are connected to an input neuron that was traced to identification are listed. Only DANs that were expert reviewed and have more than 50 identified input neurons were included in the analyses.

| Publication name  | CATMAID Skeleton ID | Review status                                                | Total dendritic post synapses | % of dendritic post synapses connected to input neuron | Included for analyses (total (inputs IDed) >50) |
|-------------------|---------------------|--------------------------------------------------------------|-------------------------------|--------------------------------------------------------|-------------------------------------------------|
| <b>γ5-1(fb)</b>   | 3639761             | standard expert review<br>+ extensive review of the dendrite | 288                           | 94.1                                                   | ✓                                               |
| <b>γ5-5(fb)</b>   | 3643424             | standard expert review<br>+ extensive review of the dendrite | 183                           | 91.3                                                   | ✓                                               |
| <b>γ5-6(fb)</b>   | 5234721             | standard expert review<br>+ extensive review of the dendrite | 217                           | 91.2                                                   | ✓                                               |
| <b>γ5-19(uc)</b>  | 6181246             | standard expert review<br>+ extensive review of the dendrite | 204                           | 91.2                                                   | ✓                                               |
| <b>γ5-20(uc)</b>  | 3134936             | standard expert review<br>+ extensive review of the dendrite | 322                           | 89.4                                                   | ✓                                               |
| <b>γ5-23(uc)</b>  | 11262395            | standard expert review<br>+ extensive review of the dendrite | 186                           | 88.2                                                   | ✓                                               |
| <b>γ5-24(uc)</b>  | 11274761            | standard expert review                                       | 148                           | 82                                                     | ✓                                               |
| <b>γ5-25(uc)</b>  | 11149656            | standard expert review (4%)                                  | 137                           | 90                                                     | ✓                                               |
| <b>γ5-16(lc)</b>  | 6019056             | standard expert review                                       | 268                           | 45                                                     | ✓                                               |
| <b>γ5-10(lc)</b>  | 5652208             | standard expert review                                       | 247                           | 81                                                     | ✓                                               |
| <b>γ5-12(lc)</b>  | 5914197             | standard expert review                                       | 225                           | 52                                                     | ✓                                               |
| <b>γ5-2(lc)</b>   | 3025479             | standard expert review                                       | 123                           | 87                                                     | ✓                                               |
| <b>γ5-7(lc)</b>   | 3026119             | standard expert review                                       | 106                           | 96                                                     | ✓                                               |
| <b>γ5-4(lc)</b>   | 3143746             | standard expert review                                       | 95                            | 58                                                     | ✓                                               |
| <b>γ5-13(lc)</b>  | 5952626             | standard expert review                                       | 72                            | 97                                                     | ✓                                               |
| <b>γ5-21(da)</b>  | 11169413            | standard expert review (60%)                                 | 109                           | 77                                                     | ✓                                               |
| <b>γ5-15(ba)</b>  | 6013704             | standard expert review                                       | 145                           | 93                                                     | ✓                                               |
| <b>γ5-17(ba)</b>  | 6059582             | standard expert review<br>+ extensive review of the dendrite | 239                           | 94.1                                                   | ✓                                               |
| <b>β'2a-1(2)</b>  | 7777207             | standard expert review<br>+ extensive review of the dendrite | 307                           | 92.5                                                   | ✓                                               |
| <b>β'2a-2(nc)</b> | 7270967             | standard expert review<br>+ extensive review of the dendrite | 169                           | 91.1                                                   | ✓                                               |
| <b>β'2a-4(1)</b>  | 8317886             | standard expert review                                       | 281                           | 93                                                     | ✓                                               |

|                      |          |                                                              |      |      |   |
|----------------------|----------|--------------------------------------------------------------|------|------|---|
| $\beta$ '2a-3(2)     | 7512499  | standard expert review (30%)                                 | 212  | 45   | ✓ |
| PPL1- $\gamma$ 1pedc | 1159799  | standard expert review<br>+ extensive review of the dendrite | 3480 | 46.9 | ✓ |
| $\gamma$ 5-22        | 11175371 | standard expert review                                       | 94   | 46   |   |
| $\gamma$ 5-8         | 5631471  | standard expert review (73%)                                 | 44   | 59   |   |
| $\beta$ '2a-5        | 6969526  | not reviewed (not fully<br>reconstructed)                    | 3    | 33   |   |
| $\beta$ '2a-6        | 5886218  | not reviewed (not fully<br>reconstructed)                    | 4    | 75   |   |

### A multistep clustering approach to classify DAN input neurons

(Left) Coarse clusters are generated by hierarchical clustering of an 'all-by-all' NBLAST comparison of simplified neurons. Neurons are simplified leaving the soma tract and the main neurite. This first step works unsupervised on all 821 neurons, resulting in 20 coarse clusters (Figure 3I). Middle: Larger primary clusters are subclustered by weighting defining neural features. 80% towards the core neurons and 20% towards the complement of the core neuron - "the fine branches" (green). This example shows SEZONS which are comprised of long tracts and a simple branched arbor. This created 153 sub-clusters with little human supervision. (Right) Fine clustering. Neurons in each sub cluster have different key morphological features thus subsequent clustering steps are different in exact parameters. These settings are reviewed manually. We determined the step - fine clustering – in most cases to be sufficiently accurate to separate all neurons that are morphologically different in different fine clusters.

#### Coarse clusters:

- Average linkage
- Simplify neuron (n=1) longest neuron path with branch
- Pruned to Strahler order < 1 (leaves soma tract)

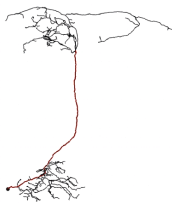

#### Subclusters:

- Average linkage
- Simplify neuron (n=3)
- Complement of simplified neuron
- NBLAST score with weighted means (80:20)

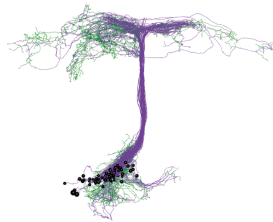

#### Fine clusters:

- Average linkage
- Simplify neuron
- NBLAST score with varying weighted means depending on neuron morphology

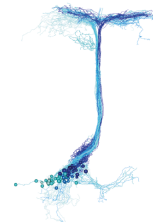

**Mantel test to determine statistical significance of correlations between properties (cluster results) compared in tanglegrams**

Here the morphological NBLAST distance matrix is compared to the observed connectivity distance matrix in Figure 2E. Comparison is by Pearson's correlation of the Manhattan distributions. The Connectivity matrix is subsequently shuffled  $10^7$  times and the resulting matrices are compared to the observed NBLAST distance matrix. Lastly (right), the correlation coefficients that are higher than the correlation coefficient between the observed data (morphology and connectivity) are divided by the number of randomisations ( $10^7$ ) to obtain a p-value. A small p-value suggests the compared distance matrices are correlated.

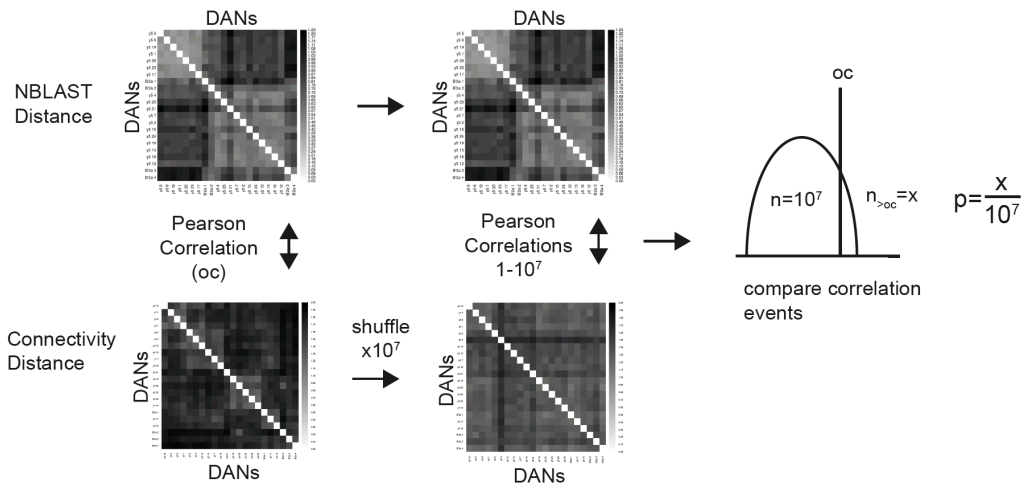

**Random connectivity null model**

CATMAID synaptic connectivity from observed data is represented as a connectivity matrix (left). This matrix is randomised conserving the proportion of DAN postsynaptic budget and input presynaptic budget in the network.  $10^4$  random matrices are computed for both the observed connectivity matrix and the random matrix, normalised by DAN postsynaptic budget (middle). A Manhattan distances between observed and simulated matrices are calculated. (B) Statistical analysis of mean Manhattan distances is carried out by comparing the distribution of Manhattan distances in the observed data (red) with the mean distribution of  $10^4$  simulated matrices (blue). The means of the two distributions are significantly different;  $p < 0.0001$ . Therefore, the organization of DAN input connectivity is not random.

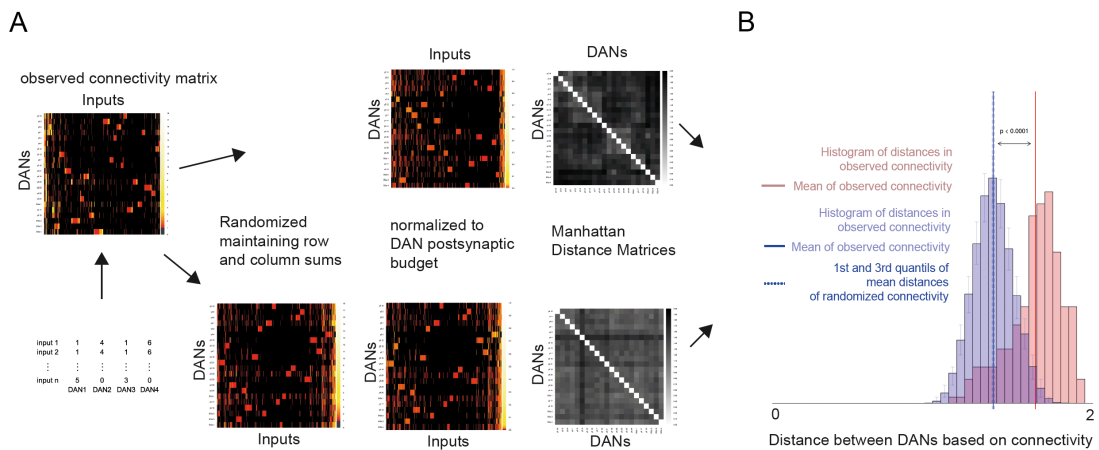

Supplement: mmc7.pdf [file mmc7.pdf]
