# Supplementary material for: Input Connectivity Reveals Additional Heterogeneity of Dopaminergic Reinforcement in Drosophila
Source: PubMed Central journal article supplement (PMC7443709; doi:10.1016/j.cub.2020.05.077), 2020-08-17
Supplement: mmc6.pdf [file mmc6.pdf]

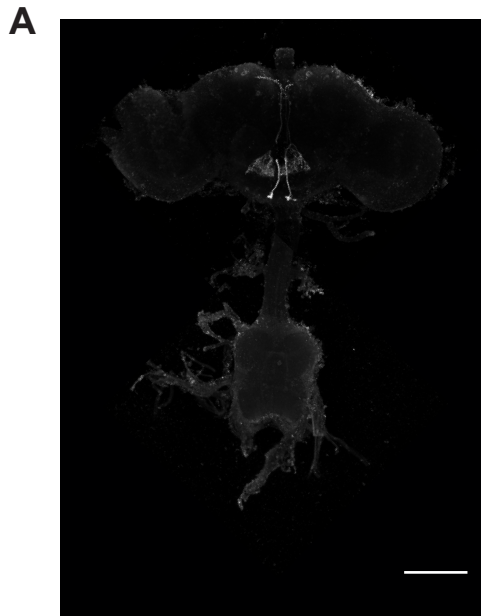

SS28305-GAL4

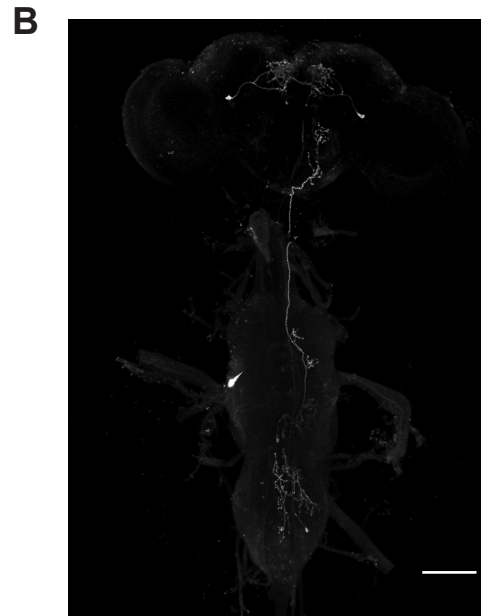

SS46348-GAL4

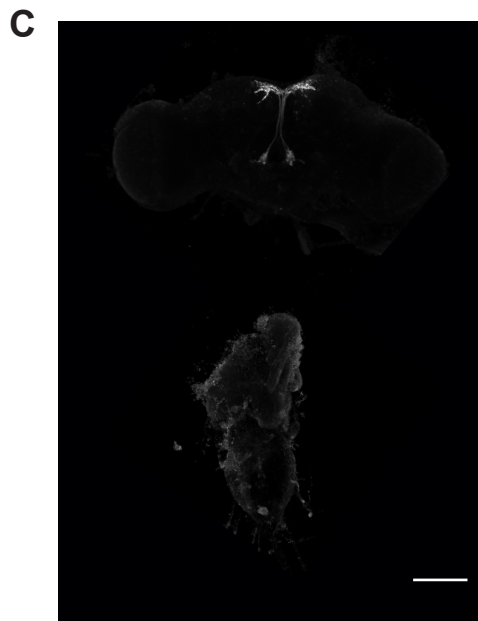

SS27959-GAL4

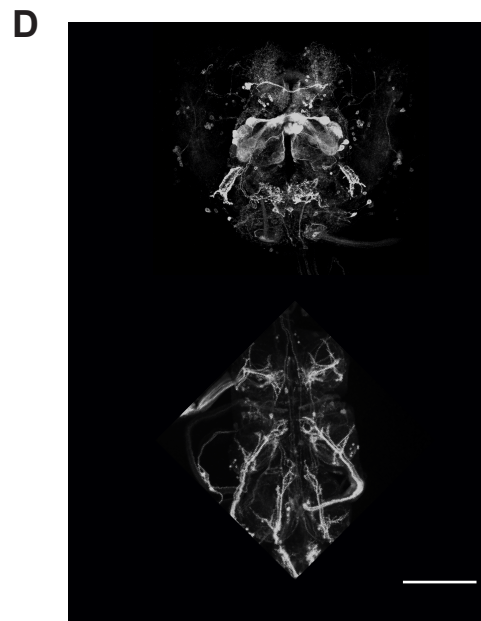

R48B04-GAL80; 0104-GAL4

*Maximum intensity projections of confocal imaging stacks of Drosophila central and ventral nervous systems (CNS and VNC). Key GAL4 driver flies used in the functional experiments are shown expressing GFP (grey) in neurons of interest. Scalebar, 100 $\mu$ m. Due to COVID-19 enforced restrictions, we direct readers to the below listed publicly accessible databases for details/images of the other lines used in this study.*

| Name          | Collection   | CNS and VNC                                                                                                                                                                            |
|---------------|--------------|----------------------------------------------------------------------------------------------------------------------------------------------------------------------------------------|
| GMR58E02-GAL4 | FlyLight     | For FlyLight and Vienna Tile lines:<br><a href="https://www.janelia.org/project-team/flylight/tools-and-reagents">https://www.janelia.org/project-team/flylight/tools-and-reagents</a> |
| GMR88F08      | FlyLight     |                                                                                                                                                                                        |
| GMR66C08      | FlyLight     |                                                                                                                                                                                        |
| MB320C-GAL4   | FlyLight     |                                                                                                                                                                                        |
| MB315C-GAL4   | FlyLight     | For the InSite Collection:<br><a href="http://www.columbia.edu/cu/insitedatabase/">http://www.columbia.edu/cu/insitedatabase/</a><br>(W. Grueber and T. Clandinin Labs)                |
| VT006202-GAL4 | Vienna Tiles |                                                                                                                                                                                        |
| 0104-GAL4     | InSite       |                                                                                                                                                                                        |
| 0804-GAL4     | InSite       |                                                                                                                                                                                        |
